# Supplementary material for: Combining Coagulation/MIEX with Biological Activated Carbon Treatment to Control Organic Fouling in the Microfiltration of Secondary Effluent
Source: MDPI journal article supplement (doi:10.3390/membranes6030039), 2016-07-30
Supplement: s1 [file s1]

# Supplementary Materials: Combining Coagulation/MIEX with Biological Activated Carbon Treatment to Control Organic Fouling in the Microfiltration of Secondary Effluent

Biplob Kumar Pramanik, Felicity A. Roddick and Linhua Fan

**Table S1.** Properties of the activated carbon used in the column.

| Physical Properties                    | Virgin GAC |
|----------------------------------------|------------|
| Surface area (BET m <sup>2</sup> /g)   | 1017       |
| Total pore volume (cm <sup>3</sup> /g) | 0.716      |
| Micropore volume (cm <sup>3</sup> /g)  | 0.297      |
| Micropore content (%)                  | 93         |
| Mesopore content (%)                   | 5          |
| Macropore content (%)                  | 2          |

**Table S2.** DOC removal using alum and ferric chloride coagulation.

| Coagulation     | pH | Dosages (mg/L) |        |          |         |
|-----------------|----|----------------|--------|----------|---------|
|                 |    | 2.5 mg/L       | 5 mg/L | 7.5 mg/L | 10 mg/L |
| Alum            | 6  | 10.4           | 14.5   | 16.3     | 17.4    |
|                 | 5  | 12.5           | 16.3   | 17.8     | 18.4    |
|                 | 4  | 12.6           | 16.1   | 17.2     | 17.8    |
| Ferric Chloride | 6  | 14.6           | 15.8   | 18.1     | 19.8    |
|                 | 5  | 14.4           | 18.5   | 19.7     | 21.2    |
|                 | 4  | 13.6           | 19.2   | 20.1     | 21.8    |

## Mass balance for organics in the filtration system

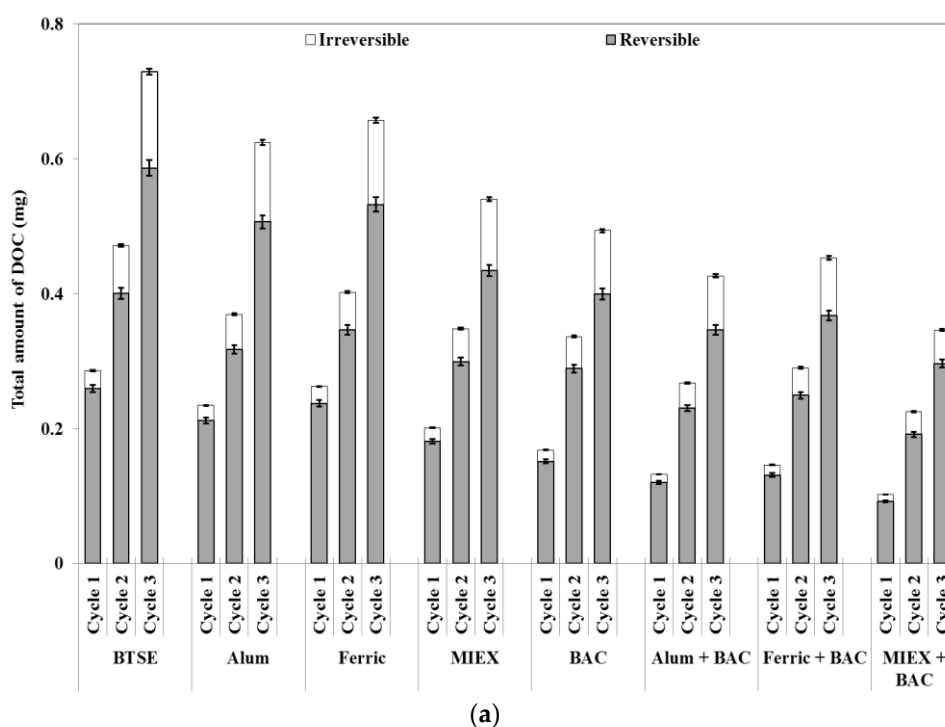

**Figure S1.** Cont.

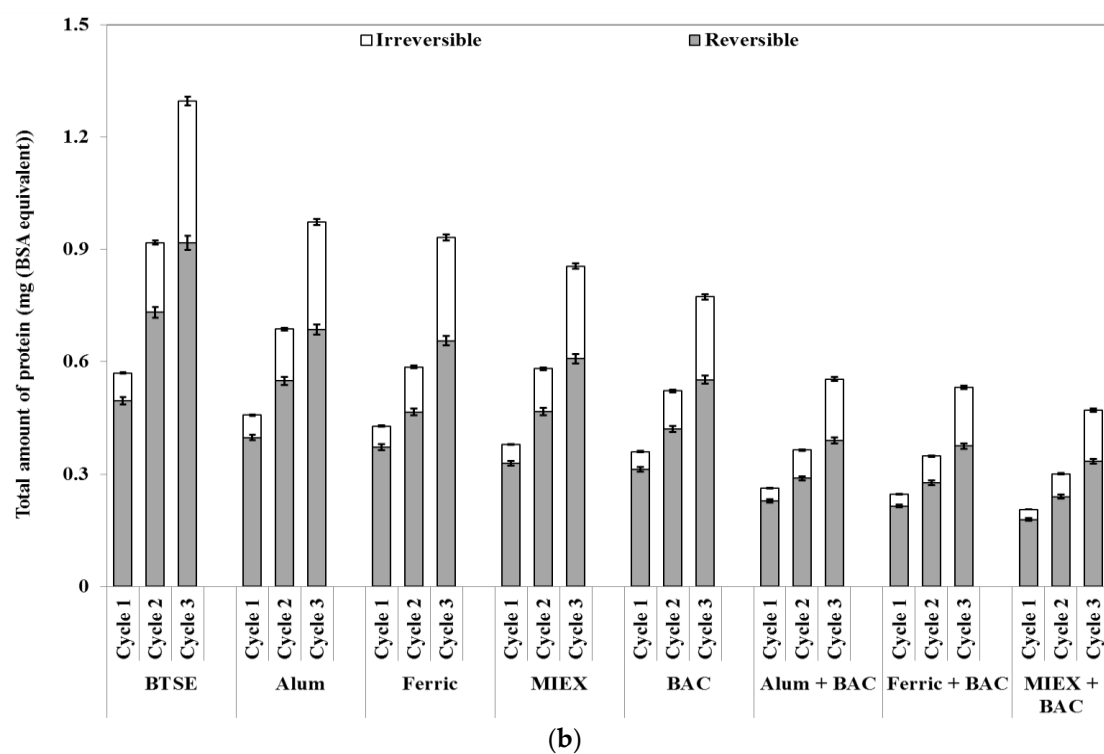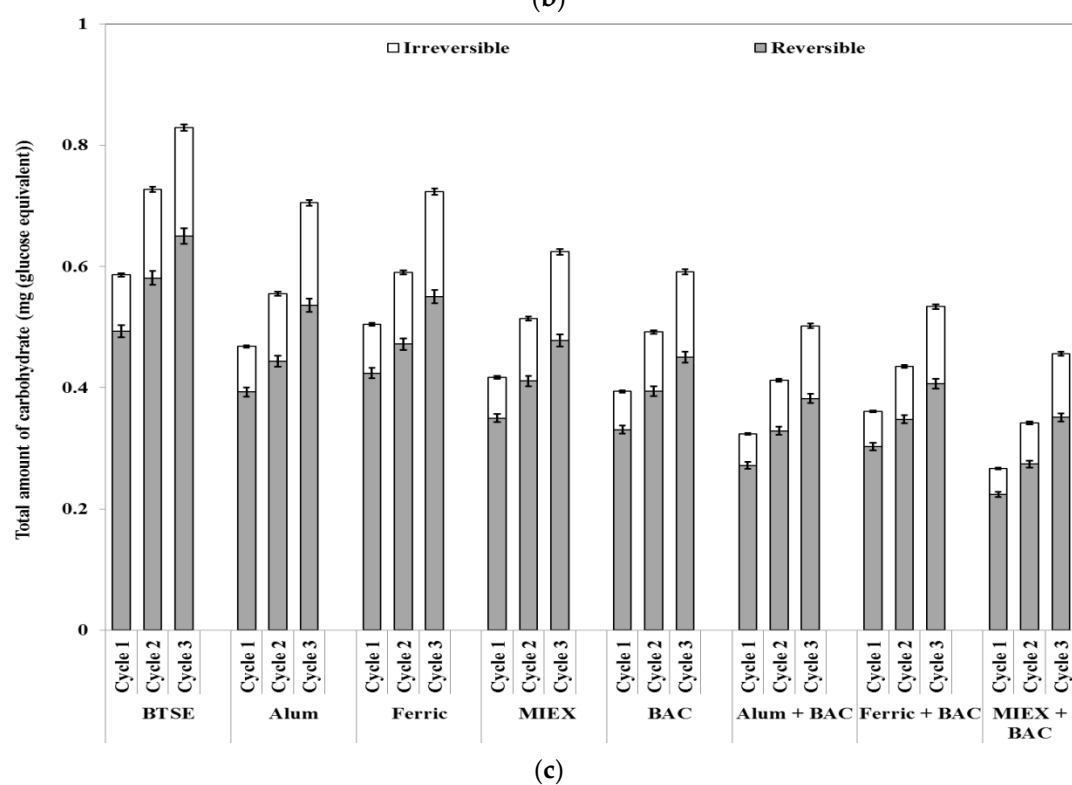

**Figure S1.** Distribution of organics in reversible and irreversible fouling after MF (a) DOC; (b) protein and (c) carbohydrate contents (data points are average values of duplicate samples).

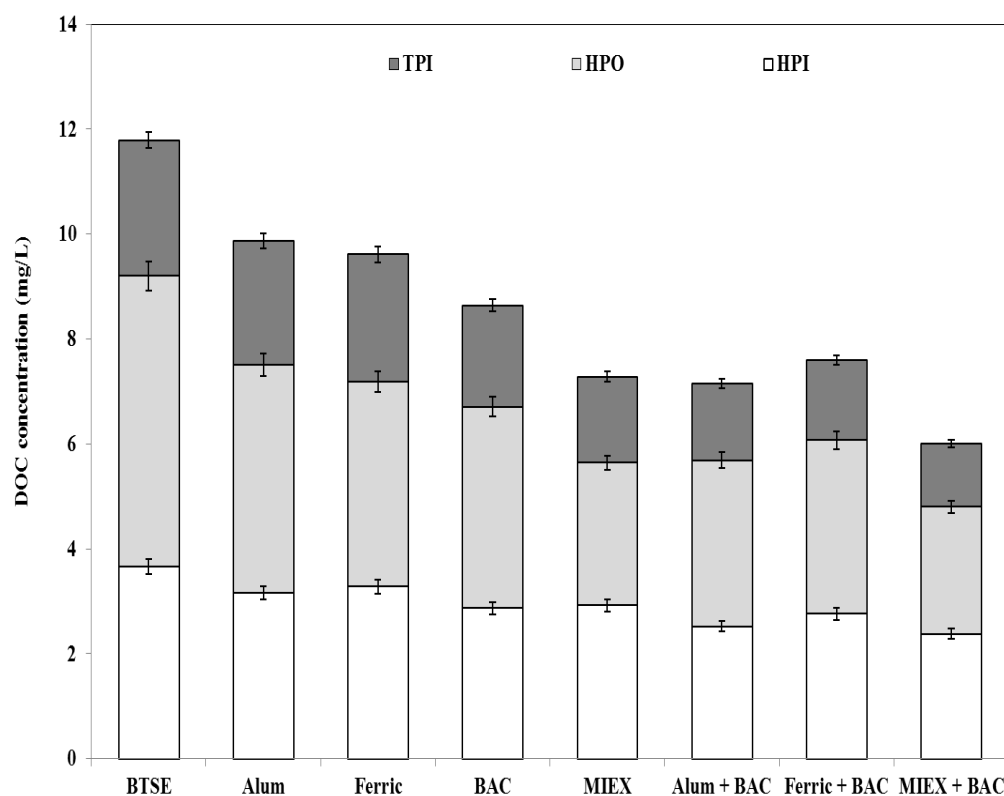

**Figure S2.** Organic fractions in BTSE and variously treated-BTSE samples (data points are average values of duplicate samples) (Note: HPI = hydrophilic, HPO = hydrophobic, TPI = transphilic).

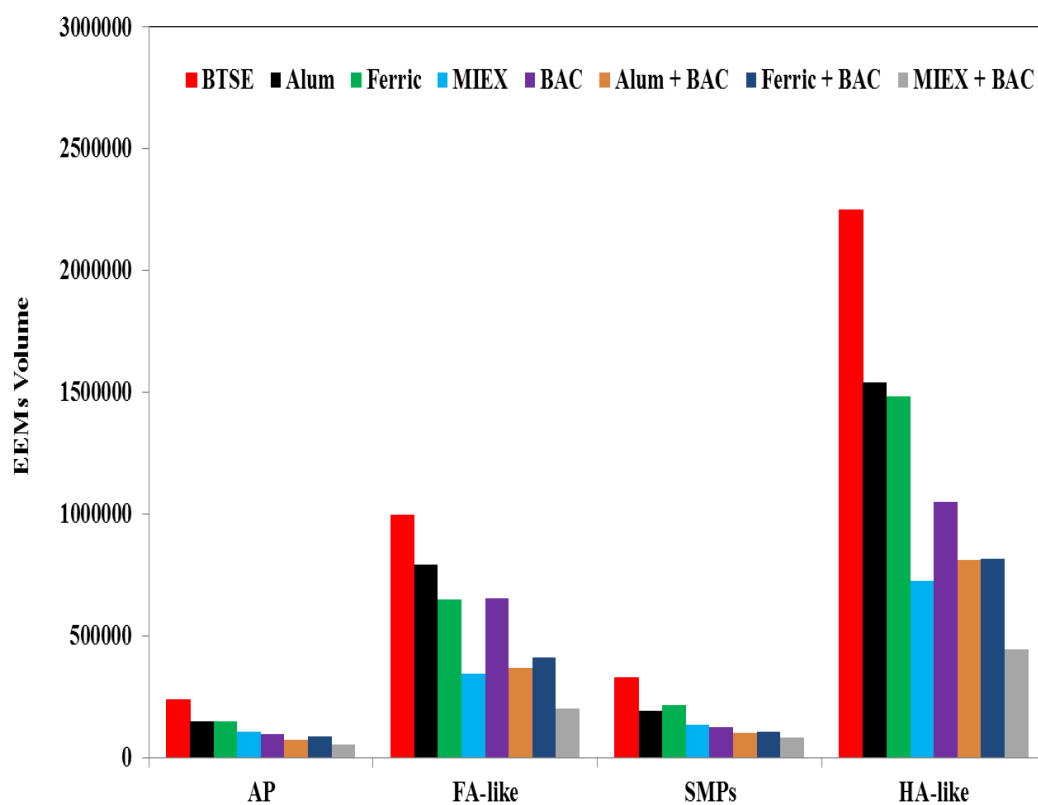

**Figure S3.** EEM spectrum volumes of the untreated and variously treated BTSE samples. (Note: AP = aromatic protein, FA = fulvic acid-like, SMPs = soluble microbial products, HA = humic acid-like).
